# Supplementary material for: MiR-125b-5p modulates the function of regulatory T cells in tumor microenvironment by targeting TNFR2
Source: PubMed Central journal article supplement — J Immunother Cancer. 2022 Nov 1;10(11):e005241. doi: 10.1136/jitc-2022-005241 (PMC9628696; doi:10.1136/jitc-2022-005241), 2022-11-01
Supplement: jitc-2022-005241supp001.pdf [file jitc-2022-005241supp001.pdf]

## Supplementary Materials for

**MiR-125b-5p modulates the function of regulatory T cells in tumor  
microenvironment by targeting TNFR2**

Mengmeng Jiang<sup>1#</sup>, Yang Yang<sup>1#</sup>, Liling Niu<sup>2,3,4</sup>, Ping Li<sup>1</sup>, Yibo Chen<sup>1</sup>, Ping Liao<sup>1</sup>,  
Yifei Wang<sup>1</sup>, Jingbin Zheng<sup>1</sup>, Fengyang Chen<sup>1</sup>, Huanhuan He<sup>5</sup>, Hui Li<sup>2,3,4,\*</sup>, Xin  
Chen<sup>1,6,7,8,\*</sup>

# These authors contribute equally to this work.

\*Corresponding author. Email: [xchen@umac.mo](mailto:xchen@umac.mo) (X.C.); [lihui@tjmuch.com](mailto:lihui@tjmuch.com) (H.L.).

**The PDF file includes:**

Figure S1. TNF increased the proportion and TNFR2 expression by Tregs.

Figure S2. Effect of miR-125b-5p on the proportion of Tregs in TNFR1<sup>-/-</sup> and  
TNFR2<sup>-/-</sup> mice.

Figure S3. Effect of miR-125b-5p on cell viability of Tregs.

Figure S4. Effect of miR-125b-5p on the proportion and proliferation of Teff cells.

Figure S5. Effect of miR-125b-5p on other phenotypic markers of Treg cells.

Table S1. Clinical pathological features of selected colon cancer patients.

## Figure legends

### Figure S1. TNF increased the proportion and TNFR2 expression by Tregs.

MACS-purified CD4<sup>+</sup> T cells from pooled lymph nodes and spleen of wild type C57BL/6J mice were cultured in the presence of IL-2 with or without TNF (10 ng/ml each). (A) Flow cytometric plot and summary of the proportion of Foxp3<sup>+</sup> Tregs in CD4<sup>+</sup> T cells in the culture with IL-2 or IL-2 plus TNF. (B) Typical FACS analysis and summary of TNFR2 expression by Tregs (gated on Foxp3<sup>+</sup> Tregs) in the culture with IL-2 or IL-2 plus TNF. MACS-purified CD4<sup>+</sup>CD25<sup>+</sup> Treg cells were transfected with miR-125b-5p mimic or inhibitor, the transfection efficiency was determined by qRT-PCR after transfected with miR-125b-5p (C) and anti-miR-125b-5p (D). Representative FACS data were from three independent experiments with similar results. Summarized data shown in A, B, and C were displayed as mean ± SEM of three independent experiments (n=9). By comparison with miR-NC (or anti-miR-NC), \*\*\*  $P < 0.001$  (Student's t-test).

### Figure S2. MiR-125b-5p inhibited the proportion of Tregs in TNFR1<sup>-/-</sup> and TNFR2<sup>-/-</sup> mice.

MACS-purified CD4<sup>+</sup> T cells from pooled lymph nodes and spleen of TNFR1<sup>-/-</sup> or TNFR2<sup>-/-</sup> mice were cultured in the presence of 10 ng/ml IL-2 and 10 ng/ml TNF, then cells were transfected with 100 nM miR-125b-5p or miR-NC. (A) Flow cytometric plot of the proportion of Tregs in TNFR1<sup>-/-</sup> and TNFR2<sup>-/-</sup> CD4<sup>+</sup> T cells after transfected with miR-125b-5p. Number shows the proportion of gated cells. (B) Summary of the proportion of Foxp3<sup>+</sup> Tregs. (C) Representative typical histograms of TNFR2 expression in Foxp3<sup>+</sup> Tregs. Number in the histogram indicates the proportion

of gated cells. (D) Summary of the proportion of TNFR2-expressing cells in Tregs. Representative FACS data were from three independent experiments with similar results. Summarized data shown in B and D were displayed as mean  $\pm$  SEM of three independent experiments (n=9). By comparison with miR-NC, \*  $P < 0.05$ , \*\*  $P < 0.01$ , \*\*\*  $P < 0.001$  (Student's t-test).

**Figure S3. Effect of miR-125b-5p on the cell viability of Tregs.**

MACS-purified CD4<sup>+</sup>CD25<sup>+</sup> Treg cells from pooled lymph nodes and spleen from WT C57BL/6J mice were cultured in the presence of 10 ng/ml IL-2 and 10 ng/ml TNF, then cells were transfected with 100 nM miR-125b-5p, anti-miR-125b-5p or their NC. (A) Flow cytometric plot and summary of the live CD4<sup>+</sup>FoxP3<sup>+</sup> Treg cells after transfected with miR-125b-5p. Number shows the proportion of gated cells. (B) Flow cytometric plot and summary of the live CD4<sup>+</sup>FoxP3<sup>+</sup> Treg cells after transfected with anti-miR-125b-5p. Number shows the proportion of gated cells. Representative FACS data were from three independent experiments with similar results. Summarized data shown in A and B were displayed as mean  $\pm$  SEM of three independent experiments (n=9). By comparison with miR-NC. ns,  $P > 0.05$ , indicate no significance (Student's t-test).

**Figure S4. Effect of miR-125b-5p on the proportion and proliferation of Teff cells.**

MACS-purified CD4<sup>+</sup>CD25<sup>-</sup> Teff cells from pooled lymph nodes and spleen from WT C57BL/6J mice were cultured in the presence of 10 ng/ml IL-2 and 10 ng/ml TNF, then cells were transfected with 100 nM miR-125b-5p, anti-miR-125b-5p or their NC.

(A) Flow cytometric plot of the proportion of CD4<sup>+</sup>CD25<sup>-</sup> Teff cells. Number shows the proportion of gated cells. (B) Typical FACS analysis of Tregs proliferation, as shown by dilution of CFSE expression (gated on CD4<sup>+</sup>CD25<sup>-</sup> Teffs) by transfected with miR-125b-5p. Number in the histogram indicates the proportion of gated cells. (C) The summary of proportion of replicating Teff cells after transfected with miR-125b-5p. (D) Typical FACS analysis of Tregs proliferation, as shown by dilution of CFSE expression (gated on CD4<sup>+</sup>CD25<sup>-</sup> Teffs) by transfected with anti-miR-125b-5p. Number in the histogram indicates the proportion of gated cells. (E) The summary of proportion of replicating Teff cells after transfected with anti-miR-125b-5p. Representative FACS data were from three independent experiments with similar results. Summarized data shown in C and E were displayed as mean  $\pm$  SEM of three independent experiments (n=9). By comparison with miR-NC. ns,  $P > 0.05$ , indicate no significance (Student's t-test).

**Figure S5. Effect of miR-125b-5p on other phenotypic markers of Treg cells.**

CD4<sup>+</sup>CD25<sup>+</sup> Treg cells were transfected with miR-125b-5p or anti-miR-125b-5p for 2 days. The mean fluorescence intensity (MFI) of PD-1 and CTLA4 expression by Tregs cultured with or without TNF (A), and in Tregs after transfected with miR-125b-5p (B) or anti-miR-125b-5p (C). All experiments were performed at least three times, all values were represented as means  $\pm$  SEM from 3 independent experiments. By comparison with miR-NC or anti-miR-NC, \*  $P < 0.05$ , \*\*  $P < 0.01$ , \*\*\*  $P < 0.001$ , (Student's t-test).

**Table S1. Clinical pathological features of selected colon cancer patients**

| Pathological features |               | miR-125b-5p expression |                | P value |
|-----------------------|---------------|------------------------|----------------|---------|
|                       |               | low<br>(n=15)          | high<br>(n=16) |         |
| Age (years)           | <median (54)  | 5                      | 7              | 1       |
|                       | ≥median (54)  | 11                     | 8              |         |
| Gender                | Male          | 10                     | 10             | 1       |
|                       | Female        | 6                      | 5              |         |
| Tumor size            | <5cm          | 5                      | 5              | 1       |
|                       | ≥5cm          | 11                     | 10             |         |
| lymphatic metastasis  | N0            | 6                      | 12             | 0.0461  |
|                       | N1            | 8                      | 2              |         |
|                       | N2            | 2                      | 1              |         |
| TNM stage             | I             | 1                      | 0              | 0.0253  |
|                       | II            | 5                      | 12             |         |
|                       | III           | 10                     | 3              |         |
| Differentiation       | Moderate/high | 15                     | 15             | 1       |
|                       | Low           | 1                      | 0              |         |
