# Supplementary figures and images for: MiR-125b-5p modulates the function of regulatory T cells in tumor microenvironment by targeting TNFR2
Source: PubMed Central journal article supplement — J Immunother Cancer. 2022 Nov 1;10(11):e005241. doi: 10.1136/jitc-2022-005241 (PMC9628696; doi:10.1136/jitc-2022-005241), 2022-11-01

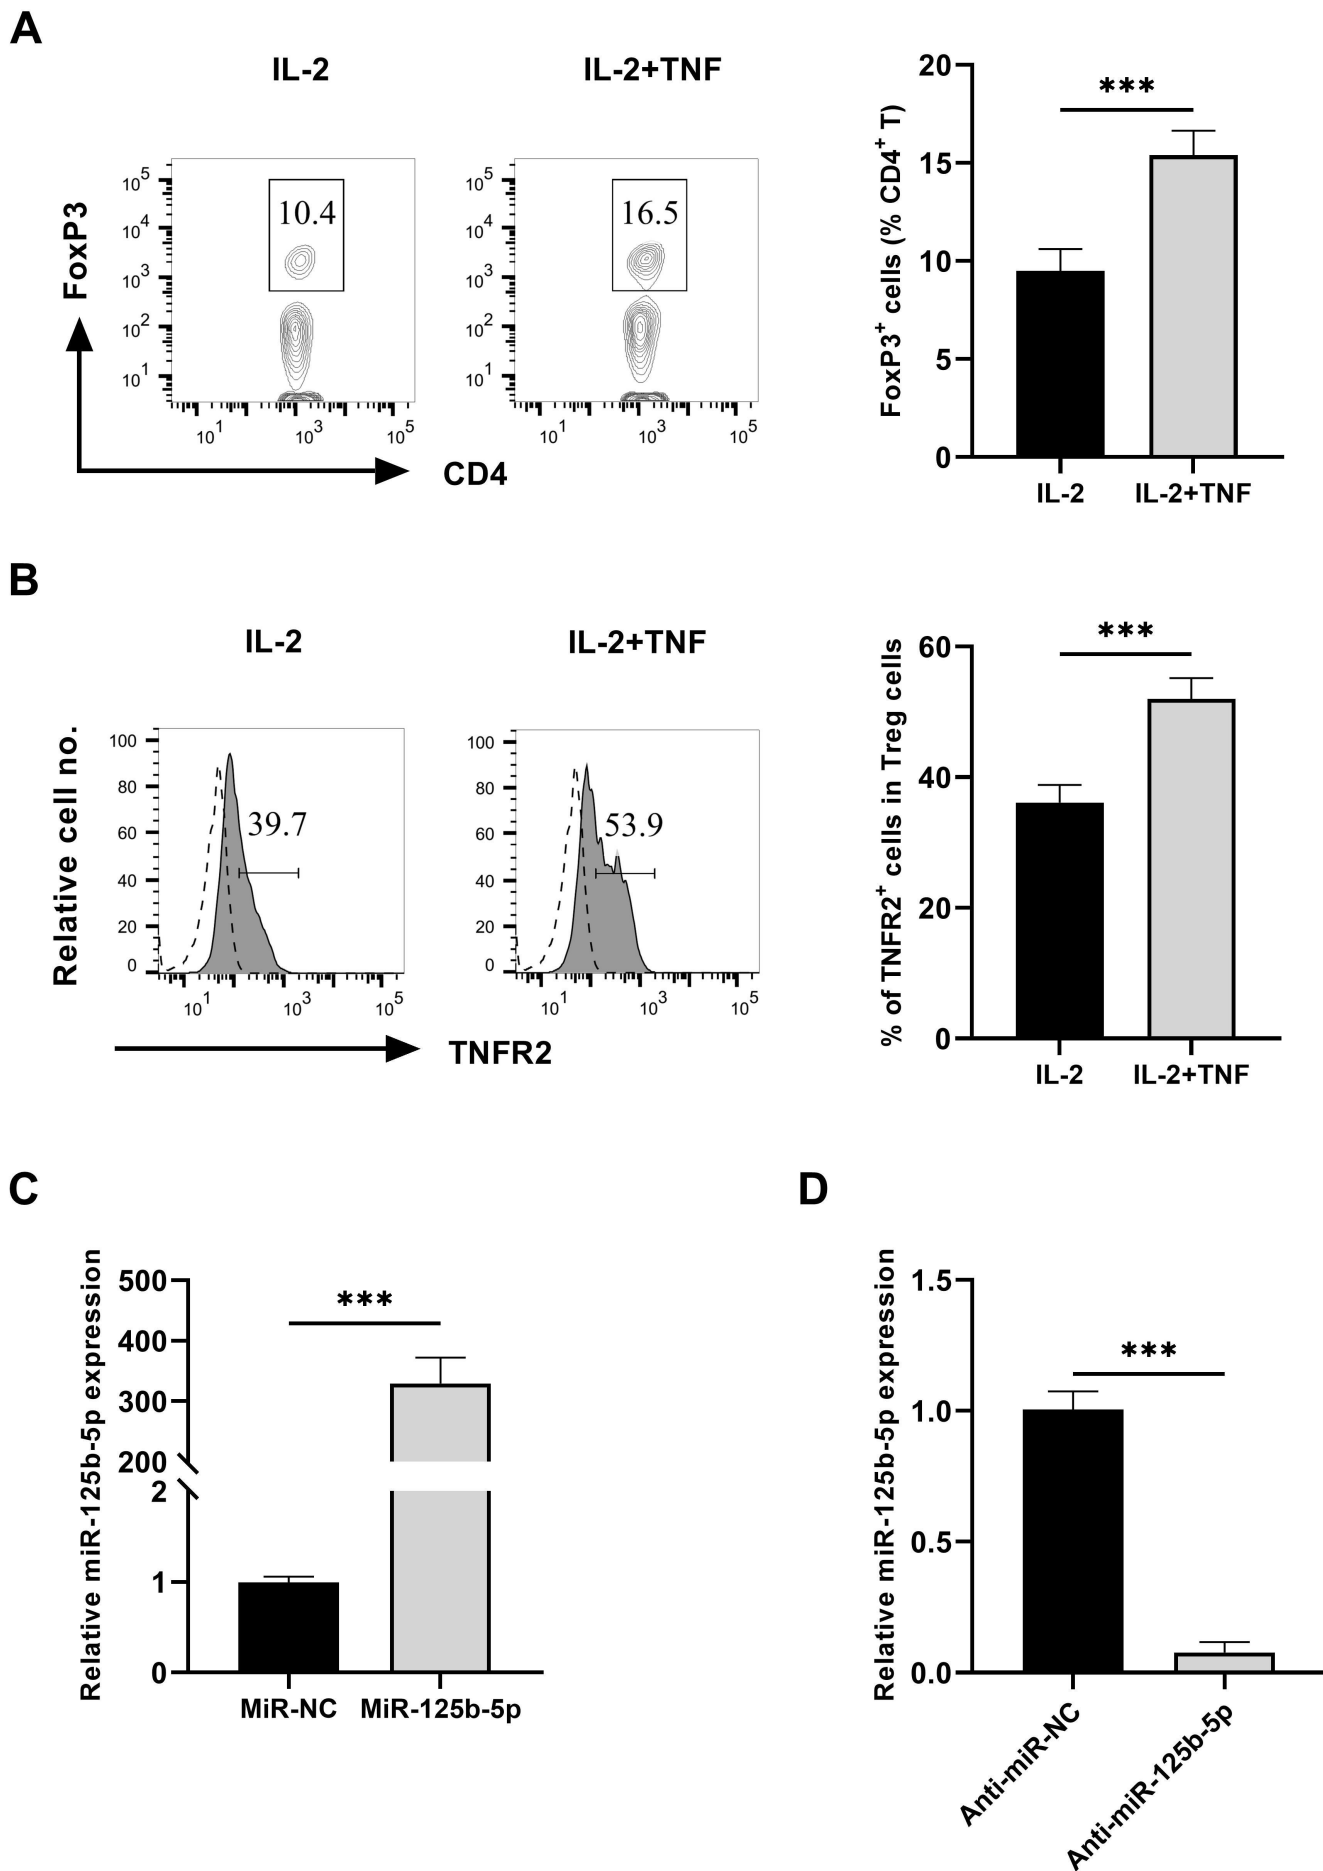

Supplement: jitc-2022-005241supp002.pdf [file jitc-2022-005241supp002.pdf]

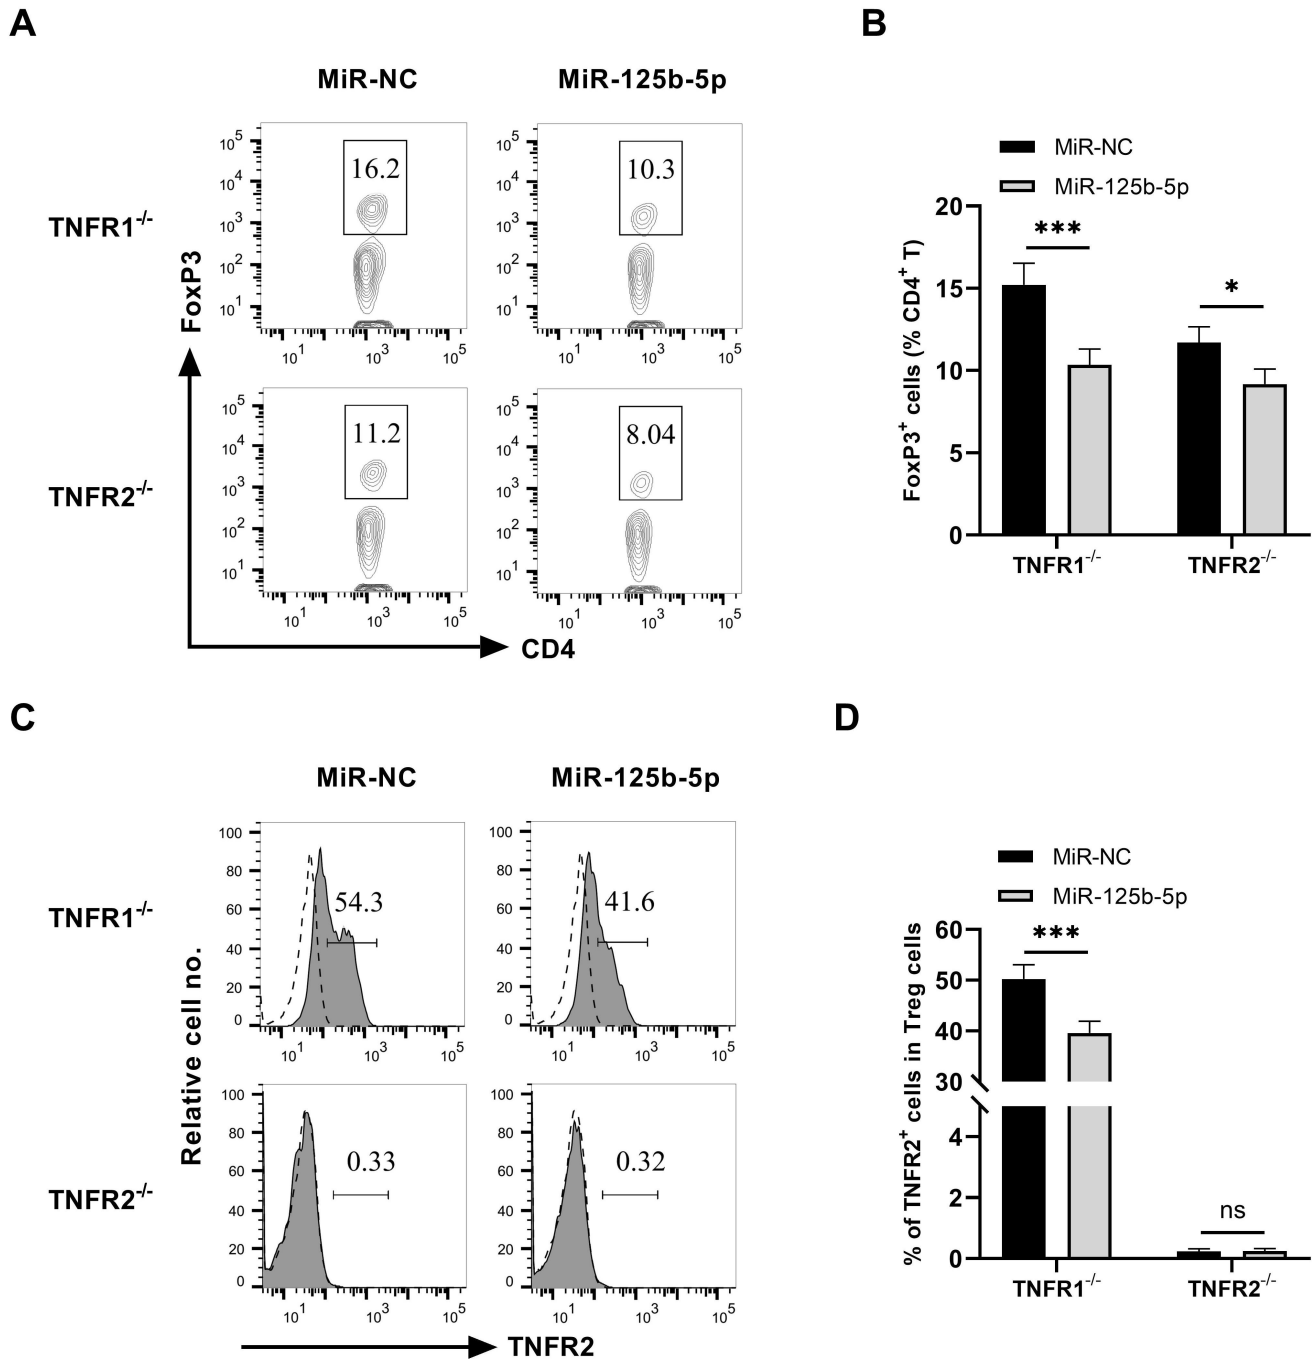

Supplement: jitc-2022-005241supp003.pdf [file jitc-2022-005241supp003.pdf]

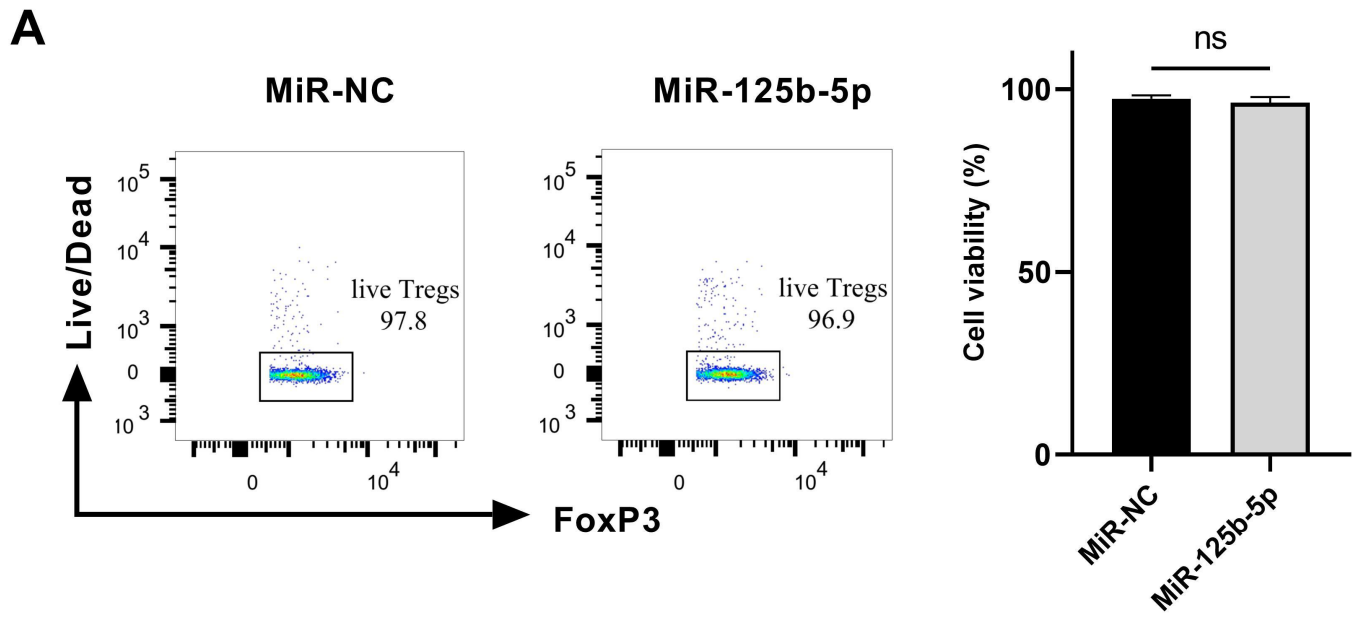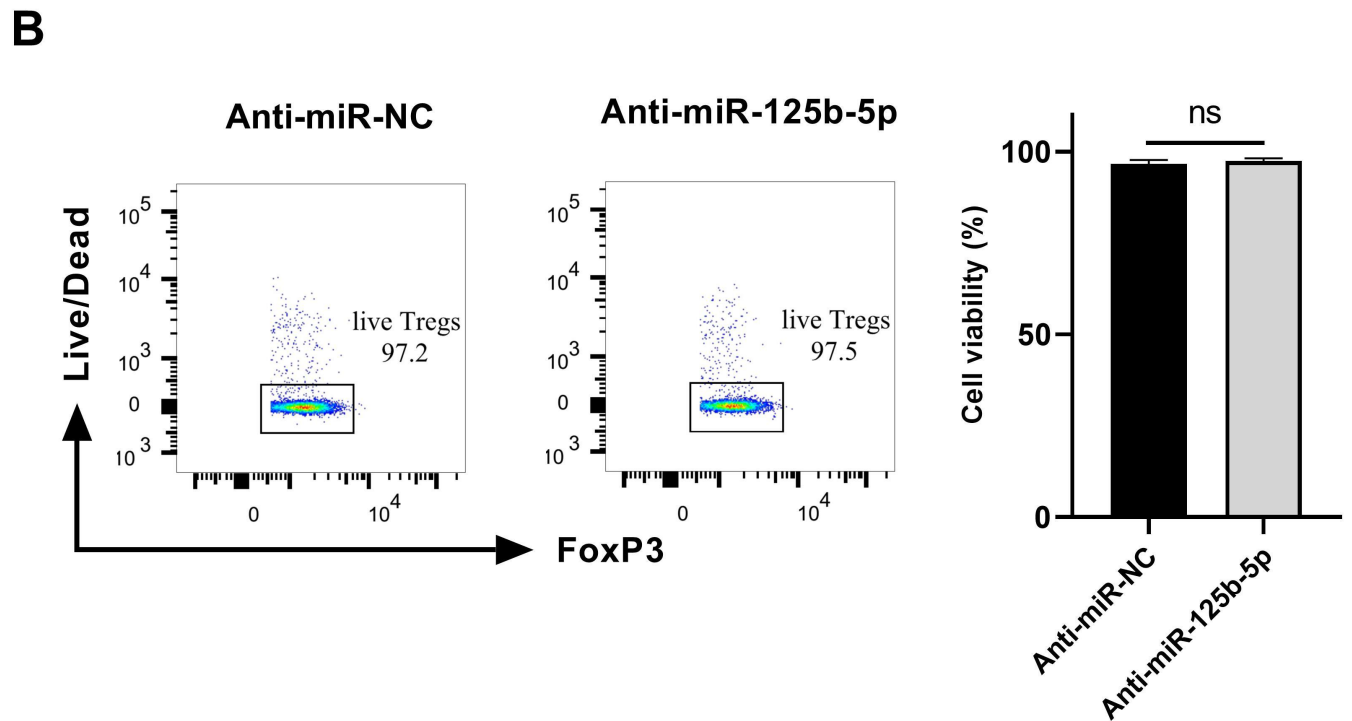

Supplement: jitc-2022-005241supp004.pdf [file jitc-2022-005241supp004.pdf]

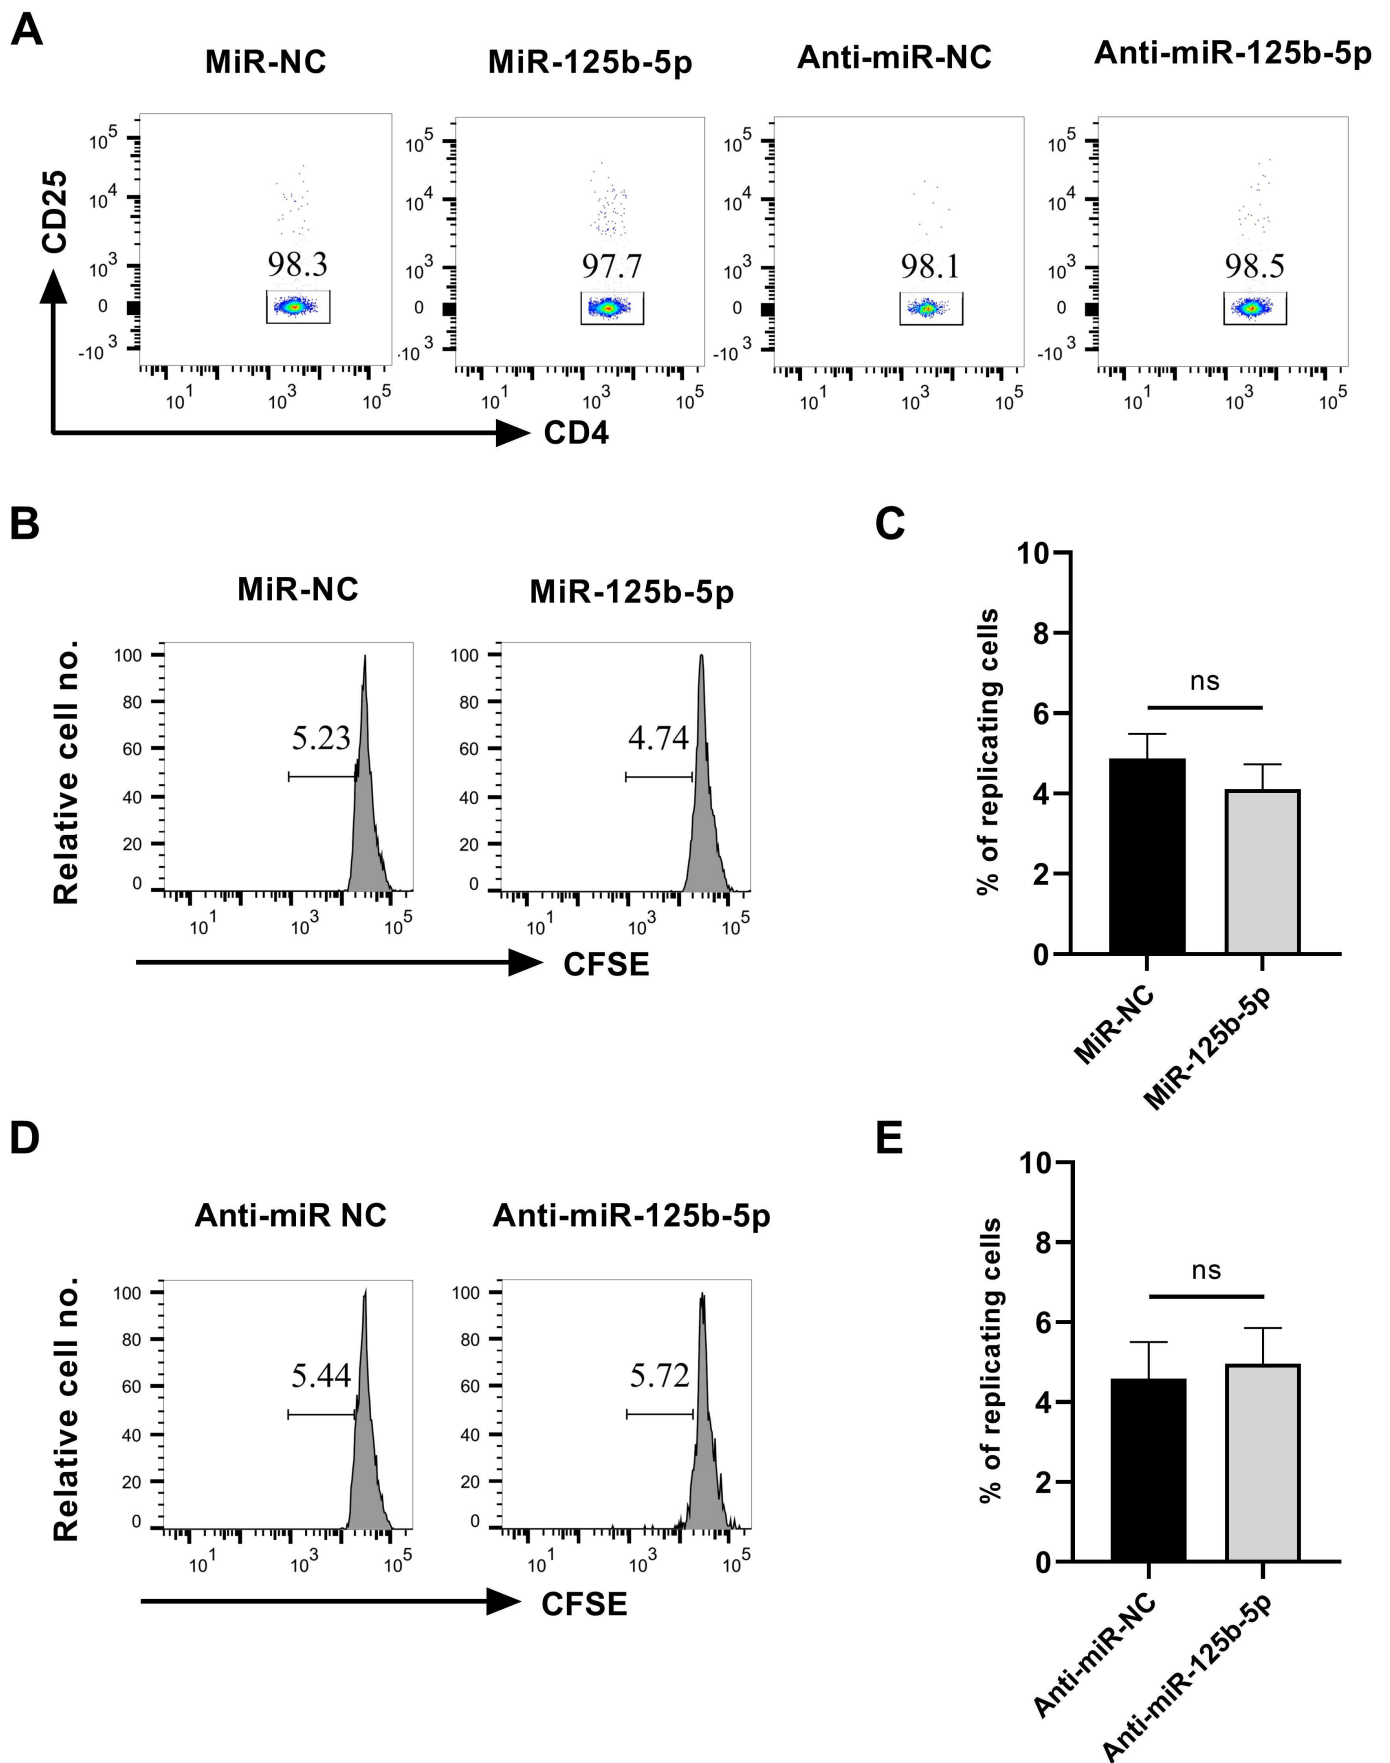

Supplement: jitc-2022-005241supp005.pdf [file jitc-2022-005241supp005.pdf]

**A**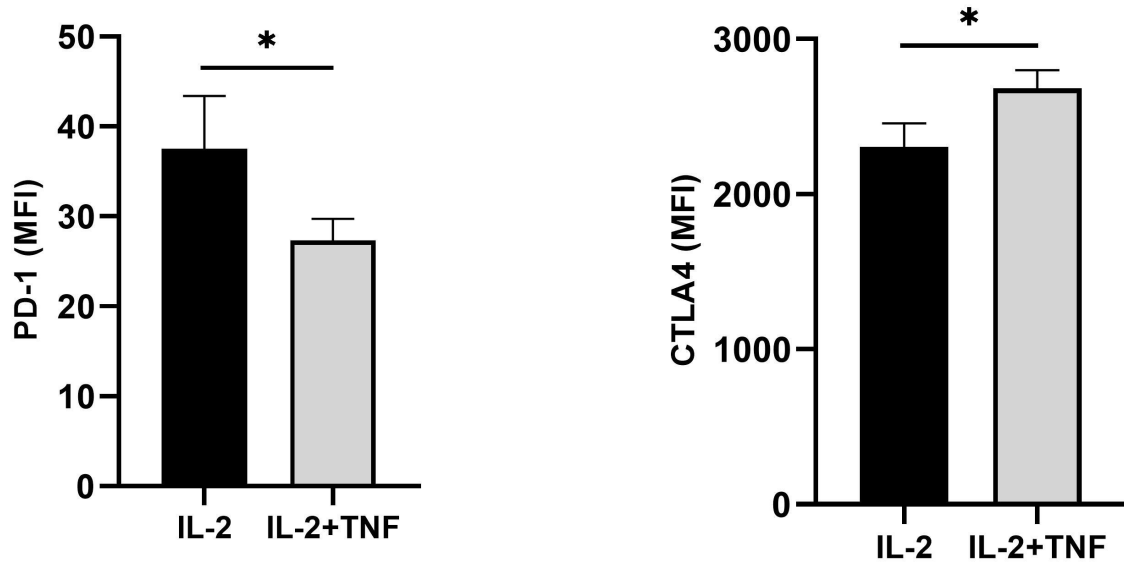**B**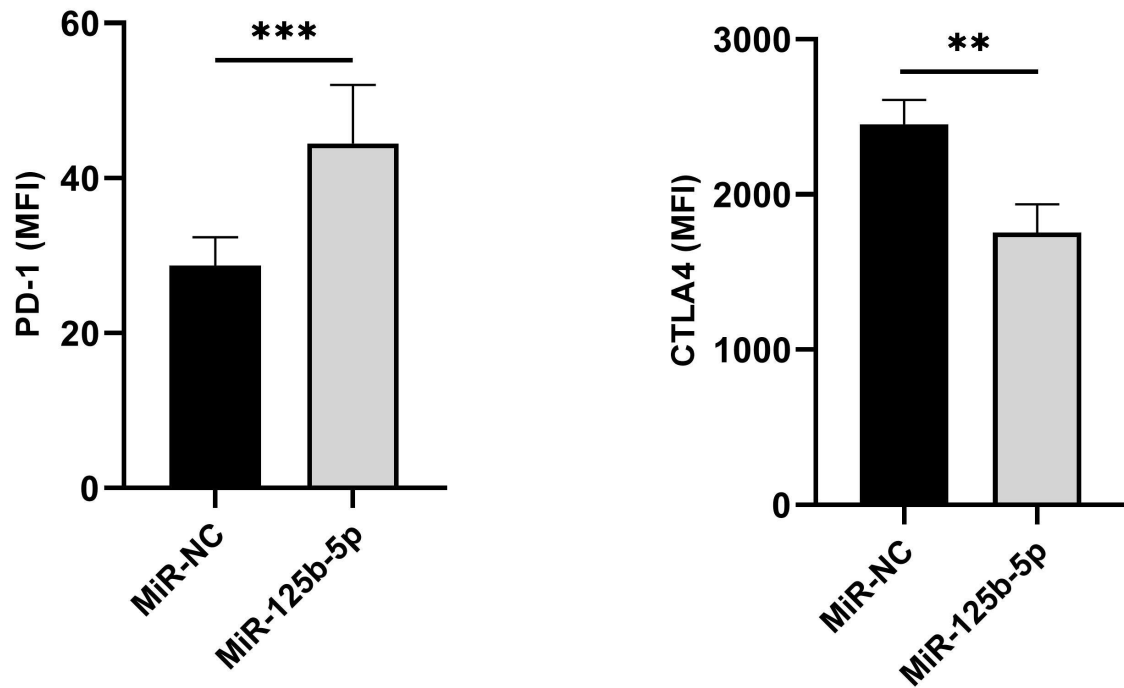**C**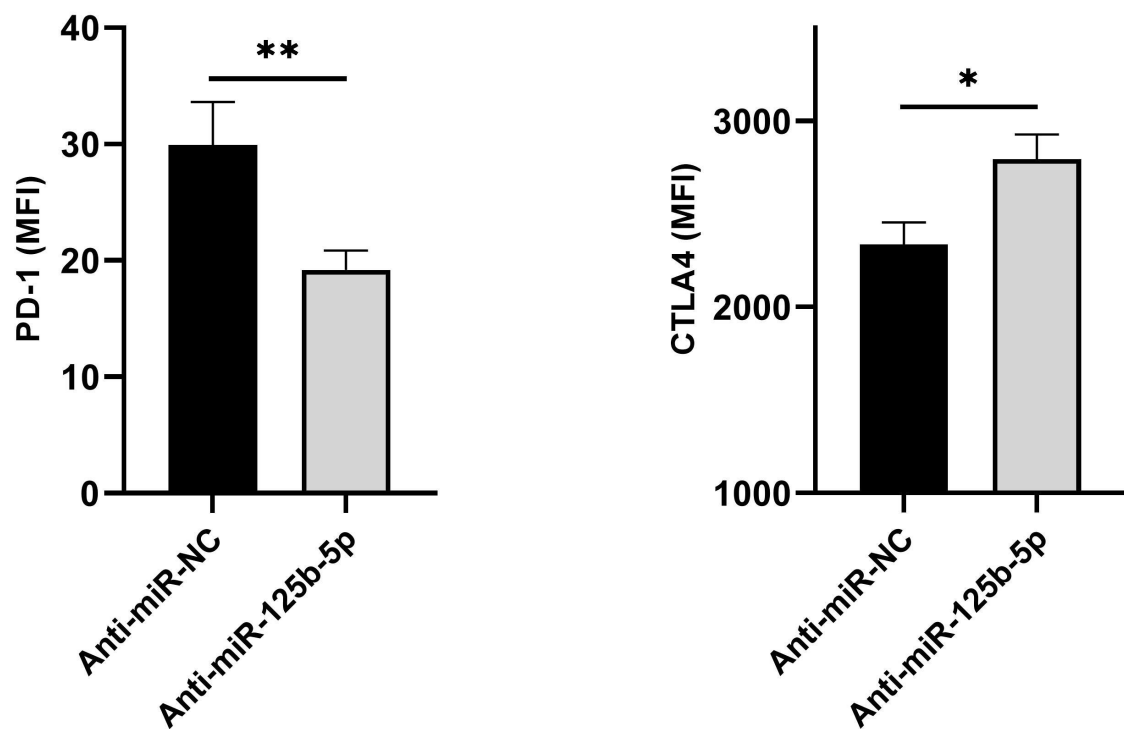

Supplement: jitc-2022-005241supp006.pdf [file jitc-2022-005241supp006.pdf]
